# Supplementary material for: The effect of ecosystem biodiversity on virus genetic diversity depends on virus species: A study of chiltepin-infecting begomoviruses in Mexico
Source: PubMed Central journal article supplement (PMC5014474; doi:10.1093/ve/vev004), 2015-06-01
Supplement: 85f8cb3ae6927c00a299595e89510e9f_Rodelo-Urregoetal_SupplementaryMaterial_Rev.pdf [file 85f8cb3ae6927c00a299595e89510e9f_Rodelo-Urregoetal_SupplementaryMaterial_Rev.pdf]

**Table S1.** Primers used for full-length sequencing of the two genomic segments (DNA-A and DNA-B) of PepGMV and PHYVV.

| <b>Virus</b> |                    | <b>Primer name</b> | <b>Primer Sequence 5'→3'</b>      | <b>Position</b> | <b>T<sub>m</sub> (°C)</b> |
|--------------|--------------------|--------------------|-----------------------------------|-----------------|---------------------------|
| PepGMV       | DNA-A <sup>1</sup> | PepGMVA2R          | CGA TCV CGH AGY TCG TTC TTC       | 697-717         | 58.3                      |
|              |                    | PepGMVA1R          | GTT CCA AAT CCC CTA TTT TTC       | 1,272-1,293     | 48.5                      |
|              |                    | PepGMVA1F          | CTC CCA RAT AAA AAC GSM ATT C     | 1,294-1,315     | 53.0                      |
|              |                    | PepGMVA3R          | GCT CAA TTC GTC ATC CTC CAC       | 1,473-1,493     | 54.4                      |
|              |                    | PepGMVA2F          | GCA TTT ACN GCG TTR TRR TAG ACG   | 2,074-2,097     | 59.1                      |
| PepGMV       | DNA-B <sup>2</sup> | PepGMVB2R          | CAT CCT TCR ATR TCT ACC ATG AC    | 964-986         | 55.3                      |
|              |                    | PepGMVB1R          | TGG ACT TYW CMC ATG TGG ACT A     | 1,561-1,582     | 54.8                      |
|              |                    | PepGMVB1F          | CAT CGT TAT GGG WGA AYT GTT T     | 1,583-1,604     | 51.1                      |
|              |                    | PepGMVB3R          | GTC ATT CTT TTC RCT VAA RGA YCC   | 1,746-1,766     | 57.4                      |
|              |                    | PepGMVB2F          | GAA GTG TTT YGC GAA TAA GAG G     | 2,121-2,142     | 53.0                      |
| PHYVV        | DNA-A <sup>3</sup> | PHYVVA2F           | CCG CMA AGA TTA GCC GAA CTG GC    | 270-292         | 60.6                      |
|              |                    | PHYVVA2R           | CGC CAT CTA CGT CAC CAT CG        | 1,505-1,524     | 55.9                      |
|              |                    | PHYVVA3F           | GAA ATG GAG GAA CCC ANG GTT CC    | 1,961-1,983     | 58.8                      |
|              |                    | PHYVVA1R           | TAG AGG AGG ACA GCA GTC TGC       | 2,125-2,145     | 56.3                      |
|              |                    | PHYVVA1F           | GCA GAT CTS CCG TCT ATT TGG       | 2,146-2,166     | 54.4                      |
| PHYVV        | DNA-B <sup>4</sup> | PHYVVB2R           | CAC ATG NCG WAT RTA RAA MCG TTC C | 953-977         | 59.3                      |
|              |                    | PHYVVB1R           | CTG ACA ACC AAG GAC ATA GC        | 1,478-1,497     | 51.8                      |
|              |                    | PHYVVB1F           | CAT CTG TGT GAG TGG TCC CTA TGG   | 1,498-1,521     | 59.1                      |
|              |                    | PHYVVB3R           | GCG TCM TTC TTY TCC YTG AAG G     | 1,822-1,843     | 58.6                      |
|              |                    | PHYVVB2F           | GCT AYA CCT AAC AAT GWT AAT GG    | 2,217-2,239     | 51.7                      |

<sup>1</sup> Position numbered as in sequence of DNA-A from PepGMV-Mo (Acc. No. AY928512).

<sup>2</sup> Position numbered as in sequence of DNA-B from PepGMV-Mo (Acc. No. AY928513).

<sup>3</sup> Position numbered as in sequence of DNA-A from PHYVV (Acc. No. NC\_001359).

<sup>4</sup> Position numbered as in sequence of DNA-B from PHYVV (Acc. No. NC\_001369).

**Table S2.** Summary of geographical origin and year of sampling of the PepGMV and PHYVV sequences used in this work.

| <b>Virus</b>  | <b>Isolate</b> | <b>Population</b> | <b>Habitat</b> | <b>Year</b> |
|---------------|----------------|-------------------|----------------|-------------|
| <b>PepGMV</b> | BER131W2004    | Bernal            | Wild           | 2004        |
|               | BER42W2007     | Bernal            | Wild           | 2007        |
|               | BER52W2007     | Bernal            | Wild           | 2007        |
|               | BER53W2007     | Bernal            | Wild           | 2007        |
|               | BER71W2007     | Bernal            | Wild           | 2007        |
|               | BER129W2009    | Bernal            | Wild           | 2009        |
|               | CER21W2007     | Cerritos          | Wild           | 2007        |
|               | CER24W2009     | Cerritos          | Wild           | 2009        |
|               | DZI03W2007     | Dzibilchaltun     | Wild           | 2007        |
|               | DZI09W2007     | Dzibilchaltun     | Wild           | 2007        |
|               | HUA05W2007     | Huatulco          | Wild           | 2007        |
|               | HUA06W2007     | Huatulco          | Wild           | 2007        |
|               | HUJ110W2009    | El Huajote        | Wild           | 2009        |
|               | HUJ111W2009    | El Huajote        | Wild           | 2009        |
|               | PEL64W2007     | Puente Elota      | Wild           | 2007        |
|               | PEL93W2007     | Puente Elota      | Wild           | 2007        |
|               | PEL94W2007     | Puente Elota      | Wild           | 2007        |
|               | PEL95W2007     | Puente Elota      | Wild           | 2007        |
|               | TUL511W2009    | Tlacuapa          | Wild           | 2009        |
|               | CER52L2004     | Cerritos          | Let-standing   | 2004        |
|               | CER53L2004     | Cerritos          | Let-standing   | 2004        |
|               | ELO14L2007     | Elota             | Let-standing   | 2007        |
|               | ELO27L2007     | Elota             | Let-standing   | 2007        |
|               | ELO35L2007     | Elota             | Let-standing   | 2007        |
|               | PVE95L2004     | Puerto Verde      | Let-standing   | 2004        |
|               | TUL2025L2001   | Tula              | Let-standing   | 2001        |
|               | TUL2028L2001   | Tula              | Let-standing   | 2001        |
|               | TUL72L2004     | Tula              | Let-standing   | 2004        |
|               | TUL19L2009     | Tula              | Let-standing   | 2009        |
|               | CER44C2009     | Cerritos          | Cultivated     | 2009        |
|               | CER45C2009     | Cerritos          | Cultivated     | 2009        |
|               | CER46C2009     | Cerritos          | Cultivated     | 2009        |
|               | CER49C2009     | Cerritos          | Cultivated     | 2009        |
|               | CHO04C2007     | Cholul            | Cultivated     | 2007        |
|               | CHO12C2007     | Cholul            | Cultivated     | 2007        |
|               | CHO13C2007     | Cholul            | Cultivated     | 2007        |
|               | CHO15C2007     | Cholul            | Cultivated     | 2007        |
|               | HUJ21C2009     | El Huajote        | Cultivated     | 2009        |
|               | HUJ23C2009     | El Huajote        | Cultivated     | 2009        |
|               | HUJ25C2009     | El Huajote        | Cultivated     | 2009        |
|               | HUJ27C2009     | El Huajote        | Cultivated     | 2009        |
|               | PVE101C2004    | Puerto Verde      | Cultivated     | 2004        |
|               | PVE12C2007     | Puerto Verde      | Cultivated     | 2007        |
|               | PVE17C2007     | Puerto Verde      | Cultivated     | 2007        |
|               | PVE19C2007     | Puerto Verde      | Cultivated     | 2007        |
|               | PVE219C2007    | Puerto Verde      | Cultivated     | 2007        |
|               | TLA31C2007     | Tlacuapa          | Cultivated     | 2007        |

| <b>PHYVV</b> |              |               |              |      |
|--------------|--------------|---------------|--------------|------|
|              | BER2114W2001 | Bernal        | Wild         | 2001 |
|              | BER111W2004  | Bernal        | Wild         | 2004 |
|              | BER41W2007   | Bernal        | Wild         | 2007 |
|              | BER52W2007   | Bernal        | Wild         | 2007 |
|              | BER1210W2009 | Bernal        | Wild         | 2009 |
|              | BER129W2009  | Bernal        | Wild         | 2009 |
|              | CER21W2007   | Cerritos      | Wild         | 2007 |
|              | CER26W2009   | Cerritos      | Wild         | 2009 |
|              | DZI03W2007   | Dzibilchaltun | Wild         | 2007 |
|              | HUA06W2007   | Huatulco      | Wild         | 2007 |
|              | HUJ111W2009  | El Huajote    | Wild         | 2009 |
|              | MAU25W2009   | Los Mautos    | Wild         | 2009 |
|              | MAU30W2009   | Los Mautos    | Wild         | 2009 |
|              | MAU31W2009   | Los Mautos    | Wild         | 2009 |
|              | MOC27W2009   | Moctezuma     | Wild         | 2009 |
|              | PEL93W2007   | Puente Elota  | Wild         | 2007 |
|              | PEL95W2007   | Puente Elota  | Wild         | 2007 |
|              | TUL510W2009  | Tula          | Wild         | 2009 |
|              | TUL59W2009   | Tula          | Wild         | 2009 |
|              | CER58L2004   | Cerritos      | Let-standing | 2004 |
|              | ELO35L2004   | Elota         | Let-standing | 2004 |
|              | ELO14L2007   | Elota         | Let-standing | 2007 |
|              | ELO22L2007   | Elota         | Let-standing | 2007 |
|              | ELO25L2007   | Elota         | Let-standing | 2007 |
|              | ELO26L2007   | Elota         | Let-standing | 2007 |
|              | PVE91L2004   | Puerto Verde  | Let-standing | 2007 |
|              | TUL2011L2001 | Tula          | Let-standing | 2001 |
|              | TUL85L2004   | Tula          | Let-standing | 2004 |
|              | TUL114L2009  | Tula          | Let-standing | 2009 |
|              | TUL312L2009  | Tula          | Let-standing | 2009 |
|              | CER43C2009   | Cerritos      | Cultivated   | 2009 |
|              | CER44C2009   | Cerritos      | Cultivated   | 2009 |
|              | CHO02C2007   | Cholul        | Cultivated   | 2007 |
|              | CHO13C2007   | Cholul        | Cultivated   | 2007 |
|              | HUJ23C2009   | El Huajote    | Cultivated   | 2009 |
|              | HUJ27C2009   | El Huajote    | Cultivated   | 2009 |
|              | PVE102C2004  | Puerto Verde  | Cultivated   | 2004 |
|              | PVE104C2004  | Puerto Verde  | Cultivated   | 2004 |
|              | PVE107C2004  | Puerto Verde  | Cultivated   | 2004 |
|              | PVE12C2007   | Puerto Verde  | Cultivated   | 2007 |
|              | PVE17C2007   | Puerto Verde  | Cultivated   | 2007 |
|              | TLA31C2007   | Tlacuapa      | Cultivated   | 2007 |

**Table S3.** Genetic diversity ( $\pi$ ),  $d_N/d_S$ ,  $d_N$  and  $d_S$  values for each gene in the PepGMV and PHYVV genomes.

|             | Habitat <sup>1</sup> | PepGMV             |                    |                    |                    |                    |                    | PHYVV              |                    |                    |                    |                    |                    |
|-------------|----------------------|--------------------|--------------------|--------------------|--------------------|--------------------|--------------------|--------------------|--------------------|--------------------|--------------------|--------------------|--------------------|
|             |                      | CP <sup>2</sup>    | REn <sup>2</sup>   | TrAP <sup>2</sup>  | Rep <sup>2</sup>   | MP <sup>2</sup>    | NSP <sup>2</sup>   | CP <sup>2</sup>    | REn <sup>2</sup>   | TrAP <sup>2</sup>  | Rep <sup>2</sup>   | MP <sup>2</sup>    | NSP <sup>2</sup>   |
| $\pi^3$     | Wild                 | 0.023±0.003        | 0.022±0.003        | 0.026±0.004        | 0.027±0.003        | 0.077±0.007        | 0.109±0.009        | 0.057±0.012        | 0.061±0.009        | 0.072±0.015        | 0.047±0.005        | 0.080±0.007        | 0.162±0.014        |
|             | Let-standing         | 0.036±0.004        | 0.045±0.009        | 0.045±0.007        | 0.044±0.004        | 0.087±0.007        | 0.105±0.010        | 0.055±0.006        | 0.061±0.010        | 0.066±0.011        | 0.047±0.006        | 0.072±0.012        | 0.084±0.008        |
|             | Cultivated           | 0.065±0.005        | 0.071±0.009        | 0.063±0.008        | 0.072±0.006        | 0.089±0.009        | 0.120±0.012        | 0.052±0.005        | 0.057±0.009        | 0.066±0.014        | 0.045±0.004        | 0.176±0.014        | 0.174±0.016        |
|             | <b>ALL</b>           | <b>0.050±0.006</b> | <b>0.047±0.006</b> | <b>0.047±0.006</b> | <b>0.050±0.004</b> | <b>0.083±0.008</b> | <b>0.111±0.009</b> | <b>0.056±0.005</b> | <b>0.059±0.009</b> | <b>0.069±0.009</b> | <b>0.046±0.005</b> | <b>0.079±0.006</b> | <b>0.170±0.014</b> |
| $d_N/d_S^3$ | Wild                 | 0.041±0.007        | 0.366±0.024        | 0.456±0.043        | 0.186±0.014        | 0.100±0.006        | 0.167±0.015        | 0.047±0.018        | 0.296±0.015        | 0.392±0.014        | 0.111±0.028        | 0.050±0.006        | 0.160±0.006        |
|             | Let-standing         | 0.026±0.005        | 0.450±0.025        | 0.555±0.038        | 0.168±0.010        | 0.076±0.010        | 0.112±0.023        | 0.030±0.007        | 0.311±0.018        | 0.416±0.020        | 0.103±0.012        | 0.036±0.002        | 0.181±0.006        |
|             | Cultivated           | 0.021±0.003        | 0.374±0.014        | 0.336±0.031        | 0.174±0.016        | 0.076±0.009        | 0.152±0.010        | 0.038±0.008        | 0.329±0.043        | 0.405±0.023        | 0.113±0.009        | 0.048±0.002        | 0.171±0.006        |
|             | <b>ALL</b>           | <b>0.025±0.002</b> | <b>0.363±0.008</b> | <b>0.407±0.011</b> | <b>0.173±0.004</b> | <b>0.087±0.002</b> | <b>0.147±0.004</b> | <b>0.040±0.005</b> | <b>0.307±0.007</b> | <b>0.398±0.006</b> | <b>0.108±0.006</b> | <b>0.047±0.002</b> | <b>0.173±0.005</b> |
| $d_N^3$     | Wild                 | 0.003±0.001        | 0.015±0.001        | 0.020±0.001        | 0.018±0.001        | 0.037±0.002        | 0.048±0.003        | 0.010±0.001        | 0.036±0.001        | 0.048±0.002        | 0.016±0.001        | 0.015±0.001        | 0.063±0.002        |
|             | Let-standing         | 0.004±0.001        | 0.052±0.007        | 0.047±0.005        | 0.020±0.001        | 0.020±0.002        | 0.031±0.003        | 0.006±0.001        | 0.036±0.002        | 0.045±0.003        | 0.016±0.001        | 0.010±0.001        | 0.074±0.003        |
|             | Cultivated           | 0.004±0.001        | 0.030±0.001        | 0.028±0.001        | 0.032±0.001        | 0.022±0.002        | 0.039±0.002        | 0.008±0.001        | 0.035±0.002        | 0.045±0.003        | 0.013±0.001        | 0.016±0.001        | 0.070±0.004        |
|             | <b>ALL</b>           | <b>0.270±0.08</b>  | <b>0.030±0.001</b> | <b>0.031±0.001</b> | <b>0.026±0.001</b> | <b>0.028±0.001</b> | <b>0.042±0.001</b> | <b>0.008±0.001</b> | <b>0.036±0.001</b> | <b>0.046±0.001</b> | <b>0.016±0.001</b> | <b>0.014±0.001</b> | <b>0.069±0.001</b> |
| $d_S^3$     | Wild                 | 0.086±0.006        | 0.041±0.003        | 0.043±0.003        | 0.096±0.004        | 0.336±0.016        | 0.290±0.015        | 0.210±0.007        | 0.121±0.004        | 0.122±0.005        | 0.147±0.005        | 0.301±0.010        | 0.396±0.015        |
|             | Let-standing         | 0.141±0.010        | 0.081±0.004        | 0.084±0.008        | 0.119±0.007        | 0.258±0.012        | 0.272±0.016        | 0.216±0.018        | 0.117±0.008        | 0.108±0.008        | 0.151±0.014        | 0.288±0.018        | 0.407±0.019        |
|             | Cultivated           | 0.168±0.006        | 0.115±0.011        | 0.085±0.003        | 0.185±0.006        | 0.288±0.011        | 0.257±0.007        | 0.201±0.013        | 0.108±0.006        | 0.111±0.006        | 0.143±0.009        | 0.323±0.018        | 0.406±0.024        |
|             | <b>ALL</b>           | <b>0.153±0.002</b> | <b>0.083±0.002</b> | <b>0.075±0.001</b> | <b>0.150±0.002</b> | <b>0.323±0.005</b> | <b>0.286±0.004</b> | <b>0.213±0.004</b> | <b>0.116±0.002</b> | <b>0.115±0.002</b> | <b>0.145±0.003</b> | <b>0.302±0.004</b> | <b>0.402±0.006</b> |

<sup>1</sup> Level of anthropisation (Wild; Let-standing; Cultivated; ALL: Wild + Let-standing + Cultivated).

<sup>2</sup> Genes harbored by the PepGMV and PHYVV genomes. CP: coat protein; REn: replication enhancer protein; Rep: replication-associated protein; TrAP: transcription activation protein; MP: movement protein; NSP: nuclear shuttle protein.

<sup>3</sup> Values are mean ± standard error based on 1000 replicates bootstrap of  $\pi$ , and based on pairwise determination of  $d_N/d_S$ ,  $d_N$  and  $d_S$ .

**Table S4.** Analysis of association between habitat and PepGMV and PHYVV phylogenies. *P*-values for three association indexes are presented: Parsimony Score (PS), Association Index (AI), and Monophyletic Clade Size (MC).

| Habitat           | PepGMV               |                      | PHYVV                |       |
|-------------------|----------------------|----------------------|----------------------|-------|
|                   | DNA-A                | DNA-B                | DNA-A                | DNA-B |
| AI                | $1.0 \times 10^{-9}$ | $1.0 \times 10^{-9}$ | $8.0 \times 10^{-3}$ | 0.160 |
| PS                | $1.9 \times 10^{-4}$ | $1.9 \times 10^{-4}$ | $6.0 \times 10^{-3}$ | 0.115 |
| MC (Wild)         | $5.0 \times 10^{-4}$ | $8.8 \times 10^{-4}$ | 0.038                | 0.037 |
| MC (Let-standing) | 1.000                | 0.317                | 0.424                | 1.000 |
| MC (Cultivated)   | $1.0 \times 10^{-4}$ | $6.9 \times 10^{-4}$ | 0.047                | 0.487 |

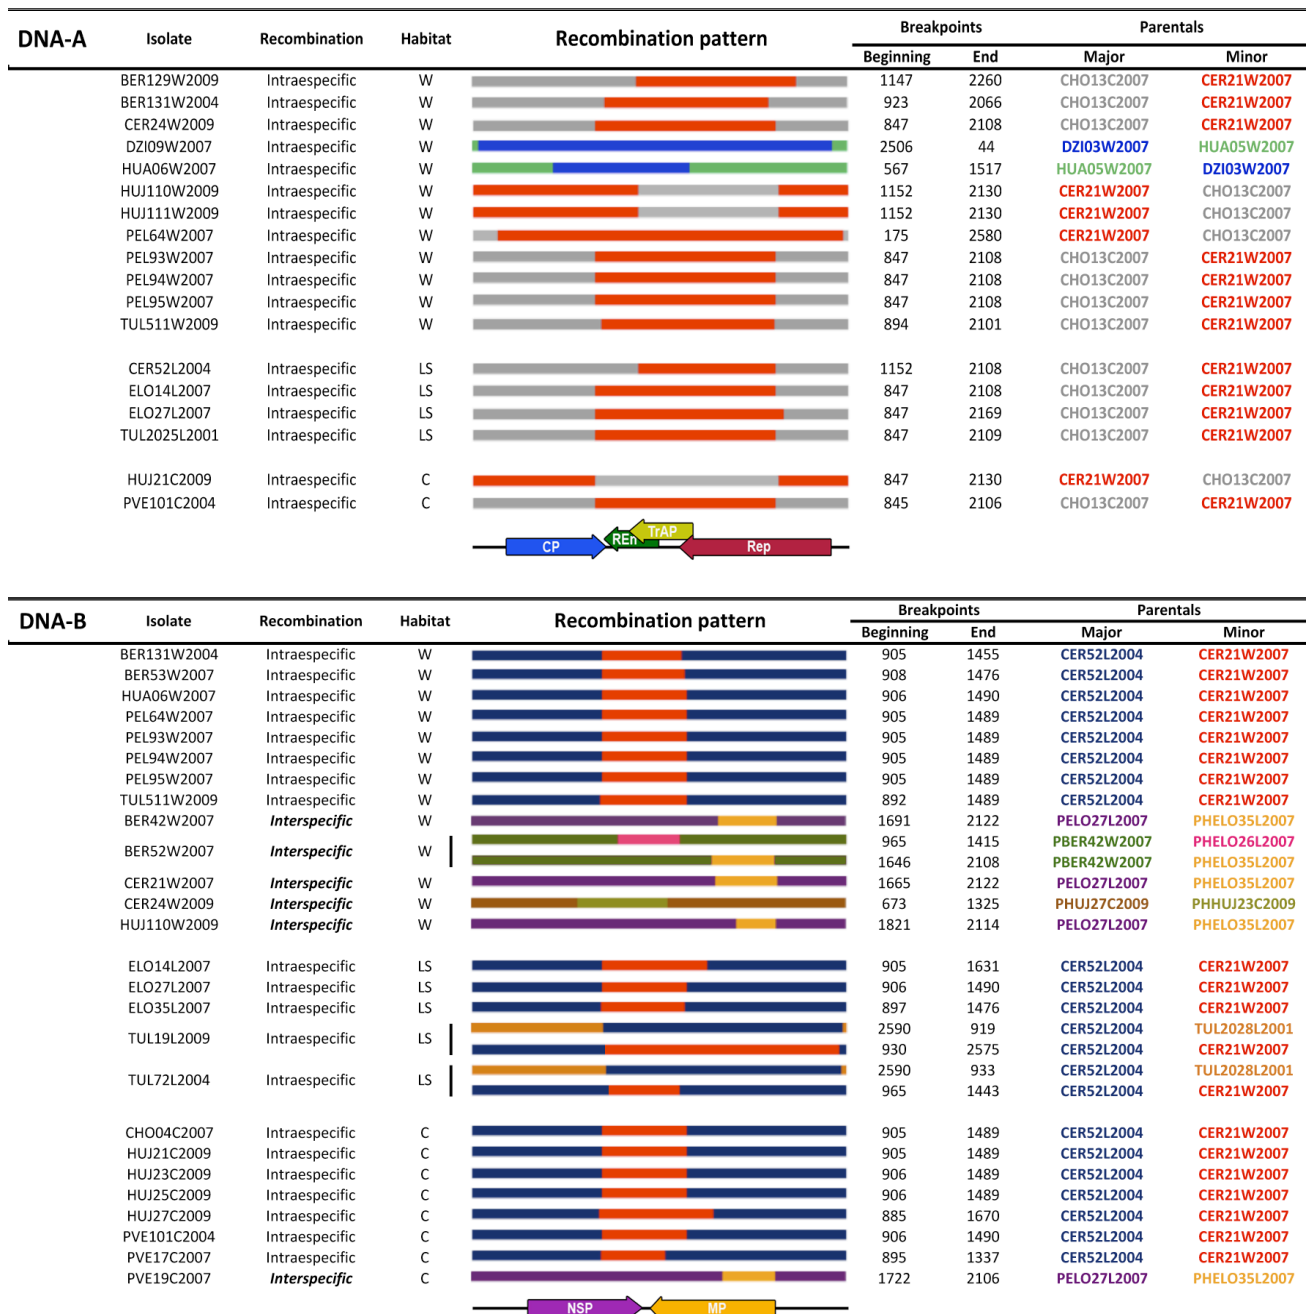

**Figure S1.** Recombination patterns in the DNA-A and DNA-B of PepGMV isolates. Isolates are presented according to the level of anthropisation of the host population. Recombination patterns are represented by linearizing both genomic DNAs at the nicking site of the invariant nonanucleotide of the origin of replication, and genomic organization of DNA-A and DNA-B is represented accordingly. Colored arrows denote the position and orientation of each gene. CP: Coat protein (blue); REn: Replication Enhancer protein (green); TrAP: Transcriptional Activator Protein (yellow); Rep: Replication protein (red); NSP: Nuclear Shuttle Protein (Purple); MP: Movement Protein (Orange). Data on the type of recombination (intra- or inter-specific), location of recombination breakpoints and parentals is also shown for each recombinant isolate.

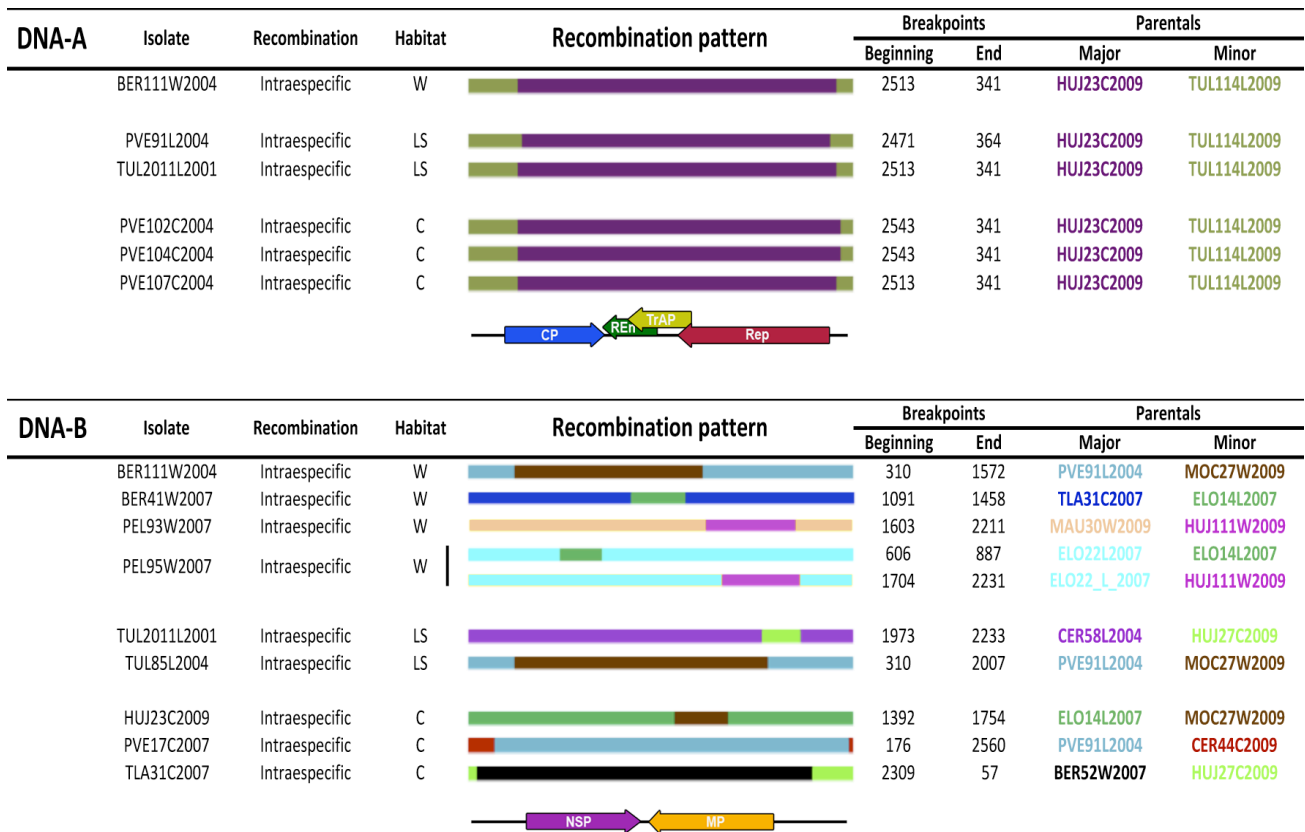

**Figure S2.** Recombination patterns in the DNA-A and DNA-B of PHYVV isolates. Isolates are presented according to the level of anthropisation of the host population. Recombination patterns are represented by linearizing both genomic DNAs at the nicking site of the invariant nonanucleotide of the origin of replication, and genomic organization of DNA-A and DNA-B is represented accordingly. Colored arrows denote the position and orientation of each gene. CP: Coat protein (blue); REn: Replication Enhancer protein (green); TrAP: Transcriptional Activator Protein (yellow); Rep: Replication protein (red); NSP: Nuclear Shuttle Protein (Purple); MP: Movement Protein (Orange). Data on the type of recombination (intra- or inter-specific), location of recombination breakpoints and parentals is also shown for each recombinant isolate.

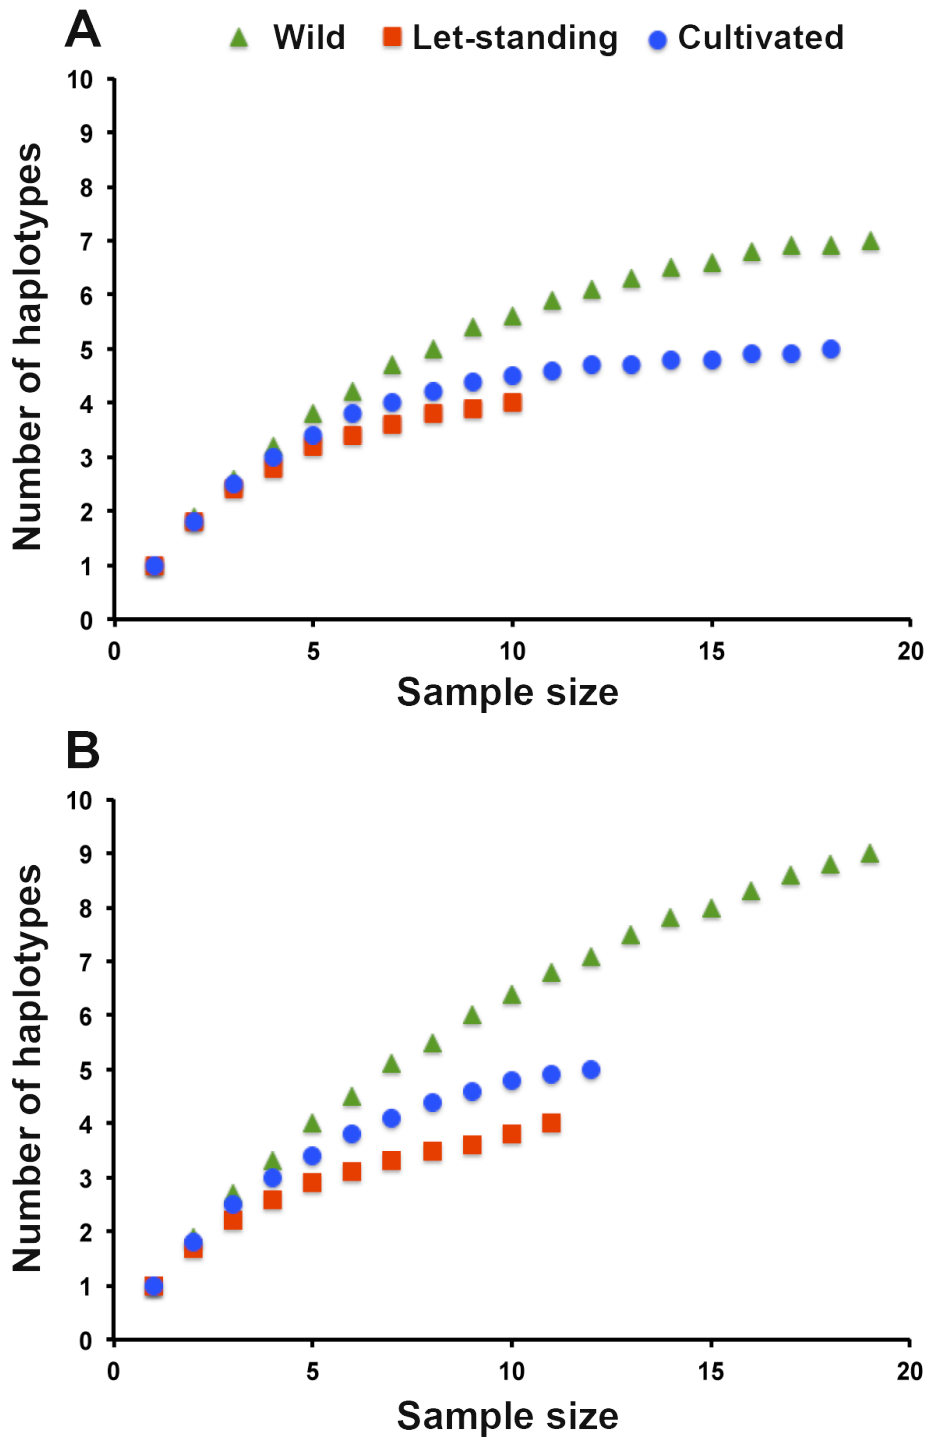

**Figure S3.** Rarefaction curves for PepGMV (A) and PHYVV (B) populations in each of the three levels of habitat anthropisation considered in this study. Curves were obtained using Analytic Rarefaction 1.3 (<http://strata.uga.edu/software/anRareReadme.html>).
